# Supplementary material for: Hypoxia-inducible factor-1α and vascular endothelial growth factor expression in circulating tumor cells of breast cancer patients
Source: Springer Nature journal article supplement (doi:10.1186/bcr2452), 2009-11-17
Supplement: Additional file 2 [file bcr2452-s2.doc]

**Quantification of VEGF, VEGFR2, HIF-1α and pFAK expression in breast cancer cell lines.**

Quantification of VEGF, VEGFR2, HIF-1α and pFAK expression in each cell line was done compared to the corresponding actin.
